# Supplementary material for: Shape evolution of Au nanoring@Ag core–shell nanostructures: diversity from a sole seed
Source: Royal Society of Chemistry journal article supplement (doi:10.1039/c4dt00992d), 2014-05-07
Supplement: c4dt00992d1.pdf [file c4dt00992d1.pdf]

# Shape Evolution of Au Nanoring@Ag Core-Shell Nanostructures: Diversity from a Sole Seed

Jingsong Sun, Jindi Wang, Ying Zhang, Pengbo Wan, Liang Luo,\* Feng Wang,\* and Xiaoming Sun\*

State Key Laboratory of Chemical Resource Engineering, P.O. Box 98, Beijing University of Chemical Technology, Beijing 100029, P.R. China.

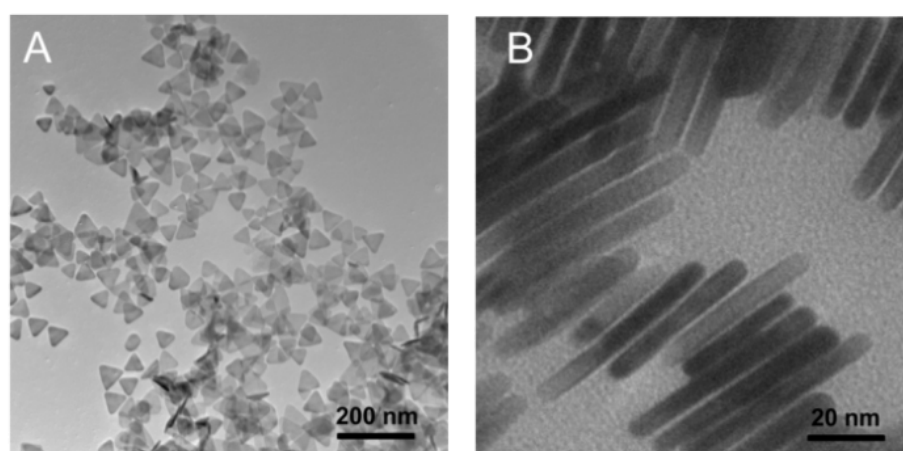

**Figure S1.** TEM images of as-prepared AgTNPs.

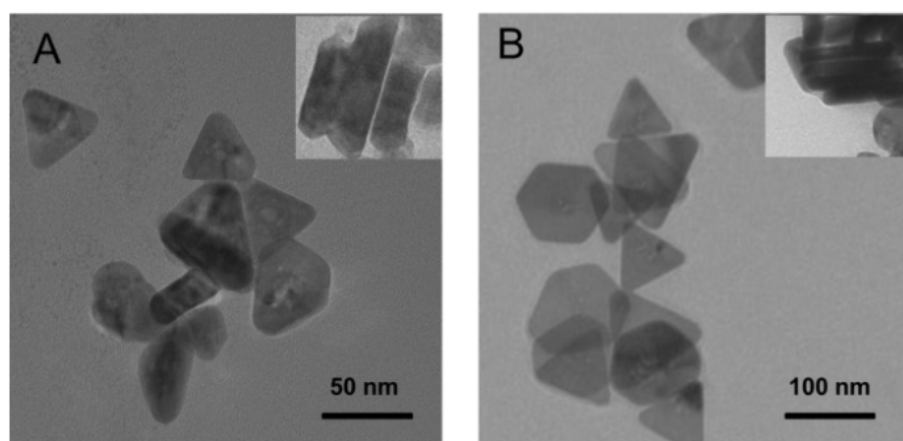

**Figure S2.** TEM images (large scale) of small and thick AuNR@AgTNPs (A) obtained by injecting AA into seed solution in the presence of  $\text{AgNO}_3$ , and big and thin AuNR@AgTNPs (B) obtained by injecting  $\text{AgNO}_3$  into seed solution in the presence of AA.

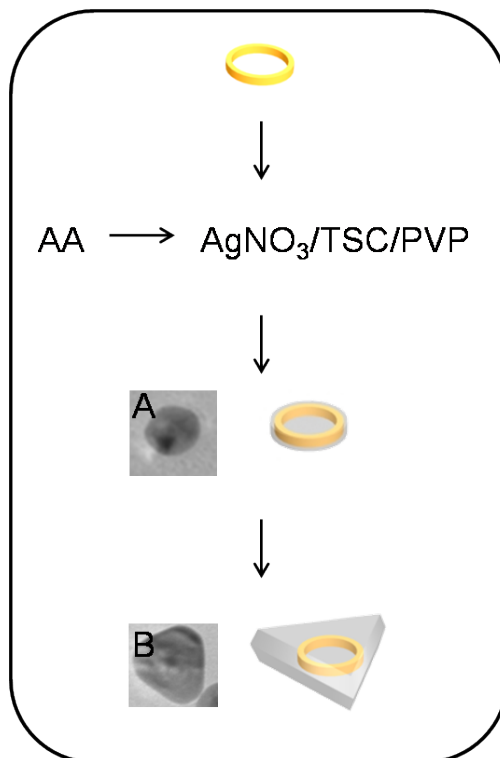

**Figure S3.** Schematic illustration of the detailed regrowth processes, and the corresponding TEM images for the AuNR@AgTNP core-shell nanostructures by injecting AA into the TSC/PVP-contained solution (A, B).

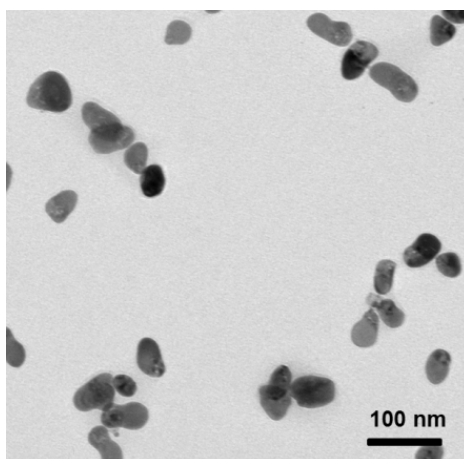

**Figure S4.** TEM of eccentric nanoplates obtained by injecting AA into the TSC-contained regrowth solution without PVP.

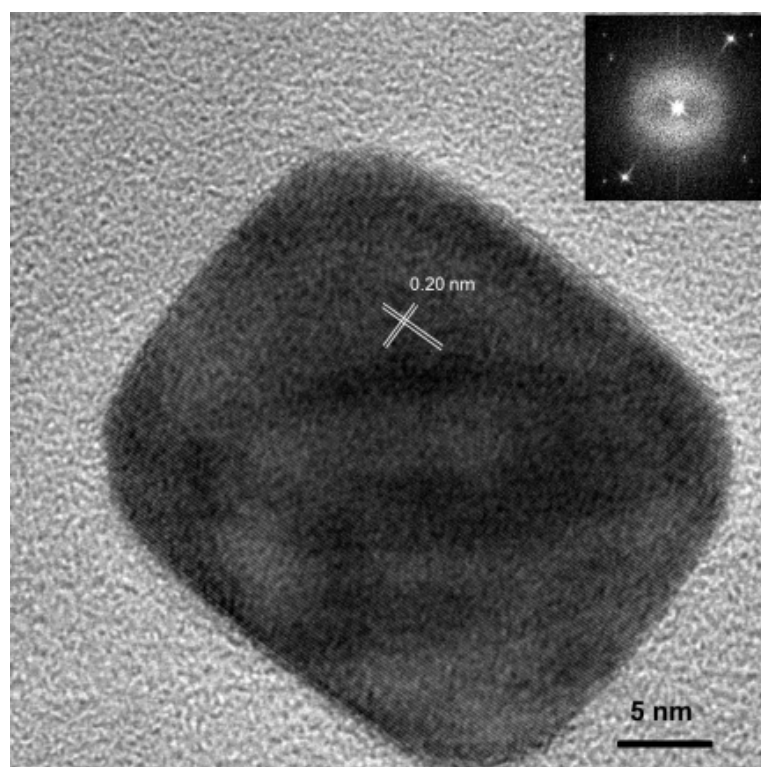

**Figure S5.** HRTEM of AuNR@Ag nanocube and the corresponding FFT pattern (inset).

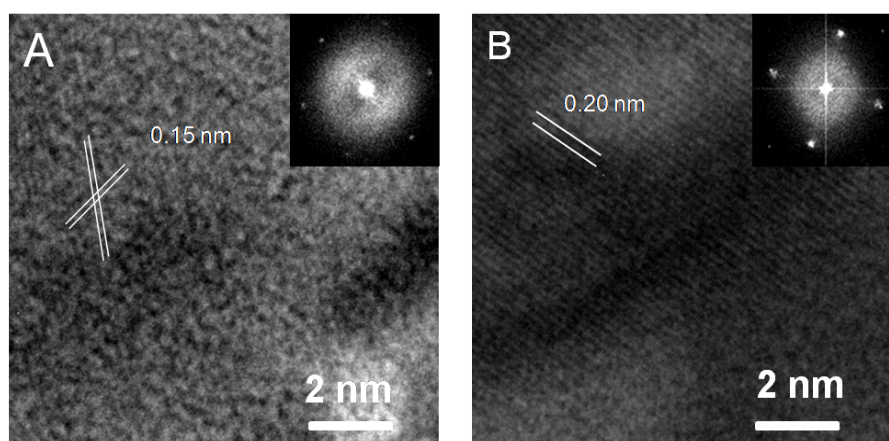

**Figure S6.** HRTEM images and FFT insets of AuNR@Ag eccentric core-shell nanoplate by injecting  $\text{AgNO}_3$  into the TSC-contained solution without PVP (A) and AuNR@Ag nanocube by injecting  $\text{AgNO}_3$  into the PVP-contained solution without TSC (B).
